# Supplementary material for: Clinical Characterization and Outcomes of Culture- and Polymerase Chain Reaction-Negative Cases of Infectious Keratitis
Source: MDPI journal article supplement (doi:10.3390/diagnostics13152528), 2023-07-29
Supplement: s1 [file s1]

**Supplementary Table S1. Systemic history of patients included in the study**

| <b>Systemic disease</b> | <b>Percentage (N=167)</b> |
|-------------------------|---------------------------|
| DMII                    | 17.37% (29)               |
| HTN                     | 29.94% (50)               |
| HLD                     | 21.56% (36)               |
| GERD                    | 10.78% (18)               |
| MRSA                    | 1.2% (2)                  |
| Recurrent URI           | 4.79% (8)                 |
| Systemic Steroids       | 9.58% (16)                |
| CN Palsy                | 2.99% (5)                 |
| Autoimmune Disease      | 12.57% (21)               |
| Migraine                | 8.38% (14)                |
| Heart Disease           | 15.57% (26)               |
| Cognitive Impairment    | 1.8% (3)                  |
| Cancer                  | 11.98% (20)               |
| Cold Sores              | 10.18% (17)               |
| Zoster                  | 4.79% (8)                 |
| Depression              | 16.77% (28)               |
| Anxiety                 | 8.98% (15)                |
| Coma/Intubated          | 1.2% (2)                  |
| Rheumatoid Arthritis    | 4.79% (8)                 |
| Multisystem Organ Fail  | 0.6% (1)                  |
| Contact Dermatitis      | 2.4% (4)                  |
| Tobacco Use             | 21.56% (36)               |
| Substance Use           | 18.56% (31)               |
| Chronic Kidney Disease  | 1.8% (3)                  |
| Cirrhosis               | 0.6% (1)                  |
| Allergies               | 49.7% (83)                |
| Asthma                  | 11.38% (19)               |
| Hepatitis               | 2.99% (5)                 |
